# Supplementary material
Source: PubMed Central journal article supplement (PMC5116714)
Supplement: IAI.00659-16_zii999091880so1.pdf [file IAI.00659-16_zii999091880so1.pdf]

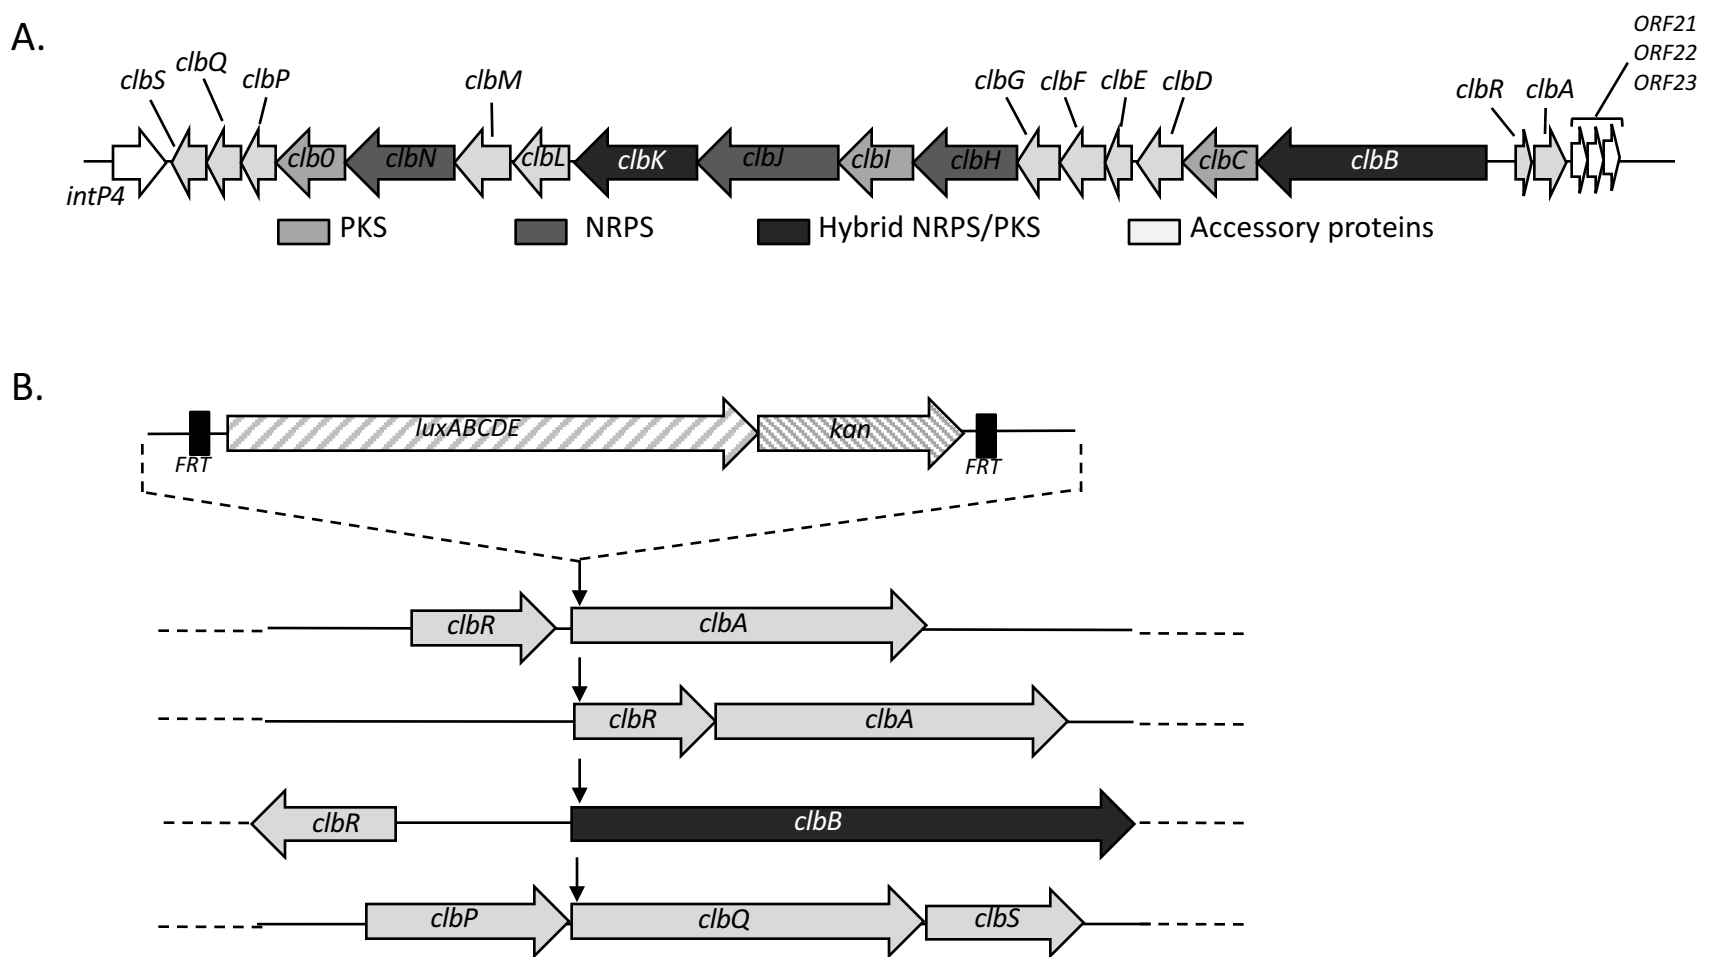

**Supplementary Figure S1:** Representation of the colibactin gene cluster with open reading frames and of the constructions containing transcriptional luciferase fusion (*lux*-fusion) with four genes belonging to the *pks* island. A. Representation of the *pks* gene cluster of *E. coli* strain IHE3034 (accession number AM229678). B. Schematic representation of position of the operon encoding the luciferase fused with the *clbA*, *clbB*, *clbQ* and *clbR* genes (21). The luciferase operon was inserted in the start codon of the genes of interest.
