# Supplementary material
Source: PubMed Central journal article supplement (PMC5116714)
Supplement: IAI.00659-16_zii999091880so2.pdf [file IAI.00659-16_zii999091880so2.pdf]

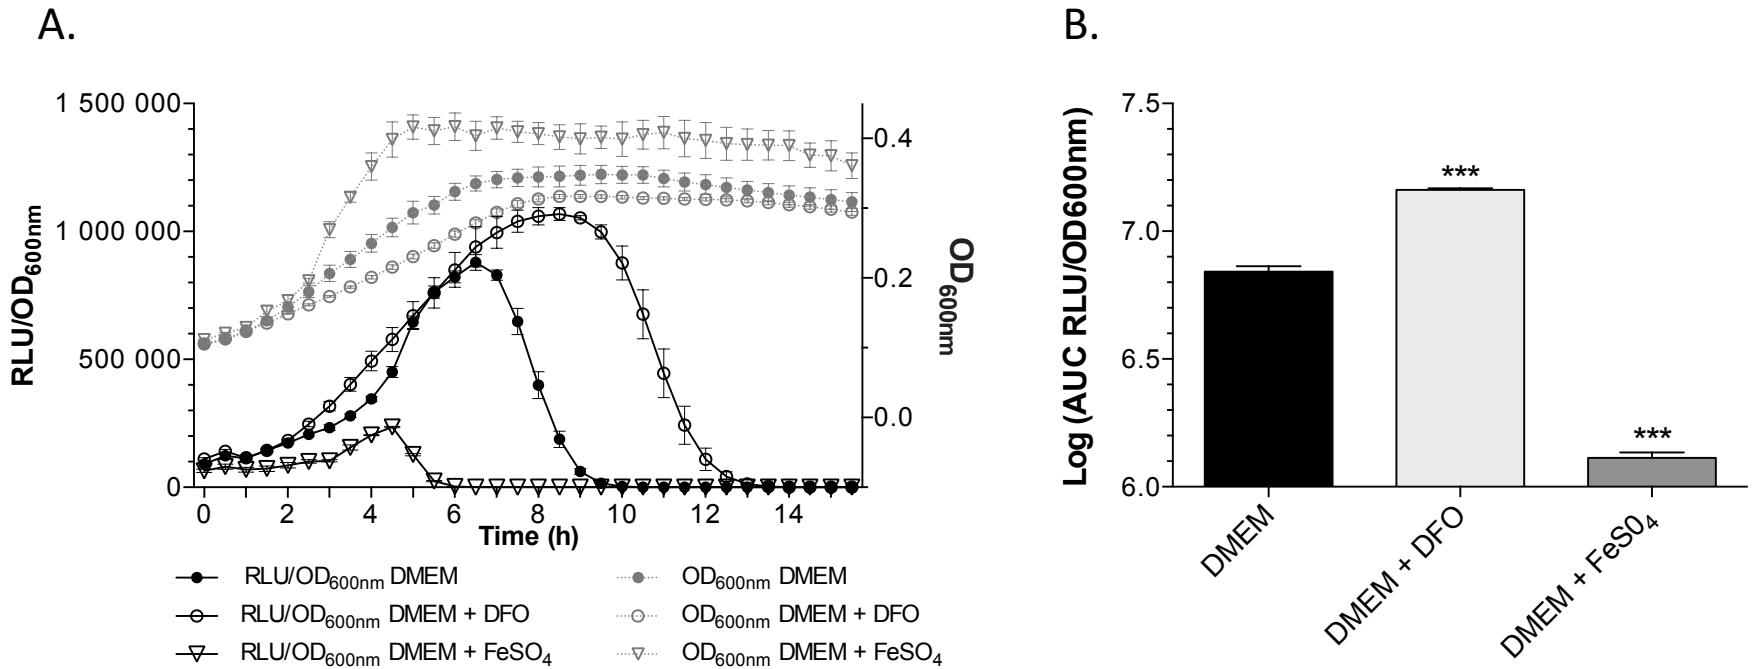

**Supplementary Figure S2:** The transcription of *clbA* is dependent on iron concentration. A. Growth curves ( $OD_{600\text{ nm}}$ ) and relative luminescence intensities ( $RLU/OD_{600\text{ nm}}$ ) of *clbA-lux* fusion strain grown at 37°C in DMEM-Hepes and DMEM-Hepes supplemented with 0.2 $\mu\text{M}$  of Desferoxamine or with 100 $\mu\text{M}$  FeSO<sub>4</sub>. B. Area Under the Curve (AUC) of the  $RLU/OD_{600\text{ nm}}$  of *clbA* calculated for the different growth conditions. The given mean RLU average values and SEM result from five independent experiments. Statistical analysis was performed using two-way ANOVA and Bonferroni post-test compared to mean values obtained in DMEM-Hepes. \*\*\* $P < 0.001$ .
