# Supplementary material
Source: PubMed Central journal article supplement (PMC5116714)
Supplement: IAI.00659-16_zii999091880so3.pdf [file IAI.00659-16_zii999091880so3.pdf]

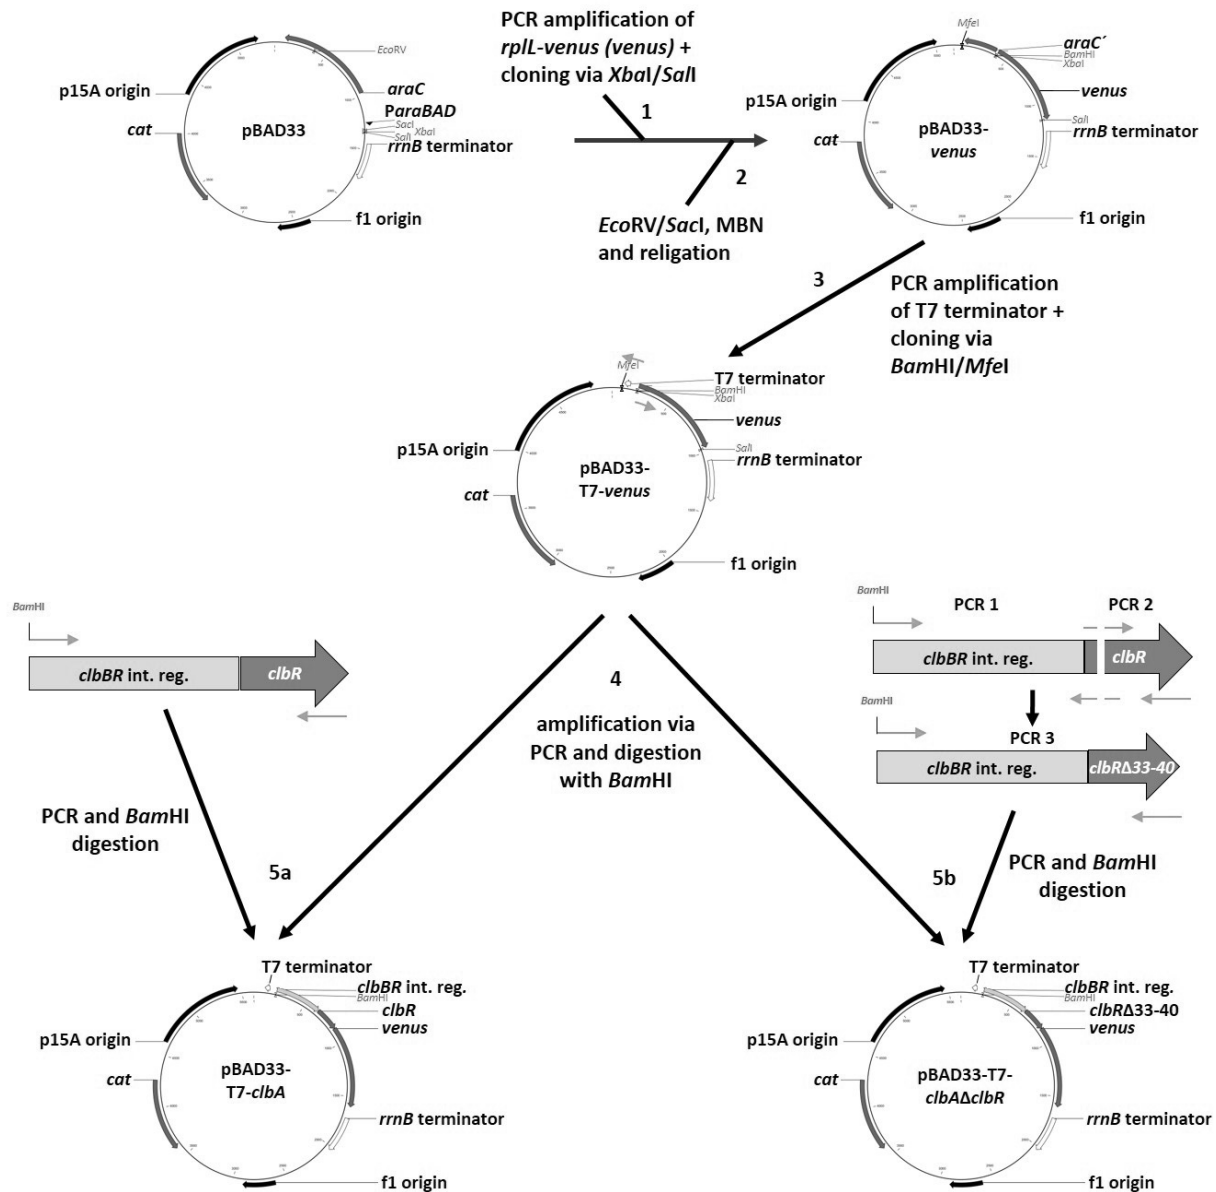

**Supplementary Figure S3:** Representation of the construction of plasmids harbouring the venus fusions. For details see description in Material and Methods.
